# 1 Estimating encounter rates as the first step of sexual selection in the 2 lizard *Anolis sagrei*.

3 Ambika Kamath<sup>1,2,4</sup> and Jonathan B. Losos<sup>1,3</sup>

4 1. Department of Organismic and Evolutionary Biology and Museum of Comparative  
5 Zoology, Harvard University, 26 Oxford Street, Cambridge MA 02138

6 2. *Present Address*: Department of Ecology, Evolution and Marine Biology, University of  
7 California Santa Barbara, Santa Barbara, CA 93106

8 3. *Present Address*: Department of Biology, Washington University at St. Louis, St. Louis, MO,  
9 63130

10 4. Author for correspondence. Email: [ambikamath@gmail.com](mailto:ambikamath@gmail.com)

11 **Keywords:** mating system, territory, territoriality, polygyny, anole, encounter rates

12

13

## Abstract

14 How individuals move through their environment dictates which other individuals they  
15 encounter, determining their social and reproductive interactions and the extent to which they  
16 experience sexual selection. Specifically, females rarely have the option of mating with all males in a  
17 population—they can only choose among the males they encounter. Further, quantifying phenotypic  
18 differences between the males that females encounter and those that sire females' offspring lends  
19 insight into how social and reproductive interactions shape male phenotypes. We used an explicitly  
20 spatiotemporal Markov chain model to estimate the number of potential mates of *Anolis sagrei* lizards  
21 from their movement behavior, and used genetic paternity assignments to quantify sexual selection  
22 on males. Females frequently encountered and mated with multiple males, offering ample  
23 opportunity for female mate choice. Sexual selection favored males that were bigger and moved over  
24 larger areas, though the effect of body size cannot be disentangled from last-male precedence. Our  
25 approach corroborates some patterns of sexual selection previously hypothesized in anoles based on  
26 describing them as territorial, whereas other results, including female multiple mating itself, are at  
27 odds with territorial polygyny, offering insight into discrepancies in other taxa between behavioral  
28 and genetic descriptions of mating systems.

## 29 **Introduction**

30 Sexual selection is a layered process, with animals sequentially having to overcome  
31 intrasexual competition, intersexual mating preferences, and, for males, post-copulatory competition  
32 and choice before achieving reproductive success [1, 2]. Decades of research have spawned a vast  
33 literature on each of these aspects of sexual selection. However, the very first step of the mating  
34 sequence—encountering potential mates—is rarely quantified. How individuals move across space  
35 through time directly influences the number and phenotypic distribution of potential mates they  
36 encounter [2–4]. Moreover, by bringing about encounters between potential mates as well as  
37 between potential competitors, individuals’ movement patterns set the stage for subsequent sexual  
38 selection through male-male competition and female choice [5, 6]. Documenting animals’ movement  
39 patterns, to understand how often and which members of the opposite sex are encountered by  
40 individuals, is thus fundamental to discovering the extent to which sexual selection can act in the  
41 wild. Concurrently, quantifying phenotypic differences between potential mates (individuals  
42 encountered) and actual mates (individuals whose offspring are borne), yields insight into the nature  
43 of selection imposed by social and reproductive interactions.

44 In particular, individuals’ movement patterns determine the potential for female mate choice  
45 to drive sexual selection [7, 8]. Female mate choice has been studied extensively, yielding vigorous  
46 debate surrounding the precise mechanisms by which it arises, acts, and is maintained across a range  
47 of taxa (reviewed in [9–11]). Common to all models of female choice, however, is the idea that  
48 females can choose among males. But whether and to what extent individual females in fact have  
49 such a choice, and therefore the extent to which female choice can drive sexual selection, depends in  
50 large part on how many males they encounter [3, 12, 13].

51 In studies of sexual selection, examinations of movement behavior are often restricted to  
52 considering how females sample among males in taxa where female mate choice is already  
53 acknowledged to be important. For example, searching behavior is often thought to be pertinent to  
54 sexual selection in species where females must visit and choose among males in leks or at fixed  
55 display sites (e.g. [8, 14]). However, similar measurements of movement behavior, and of encounters  
56 between potential mates, are equally relevant to understanding the opportunity for sexual selection  
57 in other animal species, including those where female choice is not usually considered a major  
58 selective pressure [13, 15].

59 Unexpected opportunities for female choice are often uncovered in species in which earlier  
60 behavioral descriptions of mating systems, based on movement patterns and social interactions, are  
61 found to be inconsistent with more recent genetic descriptions of mating patterns [16]. For example,  
62 most birds were widely regarded as monogamous prior to the advent of genetic tools that revealed  
63 frequent extrapair copulation [17]. Occasionally, these inconsistencies have prompted researchers to  
64 reexamine animal movement to reconcile behavioral and genetic descriptions of mating patterns (e.g.  
65 [18, 19]). For example, tracking the movement behavior of red deer revealed that females move  
66 long distances between harems unexpectedly often, demonstrating the possibility of female choice in  
67 a system where sexual selection was thought to be dominated by male-male competition [20]. In  
68 general, though, discrepancies between behavioral and genetic descriptions of mating systems  
69 remain common—consider how often species are described as “socially monogamous,” for  
70 example, but “genetically promiscuous.” These discrepancies imply that our descriptions of  
71 movement and social behaviors in many species remain incomplete or inaccurate, and we do not  
72 fully understand how sexual selection has shaped and is shaped by these behaviors.

73 In this paper, we develop an explicitly spatiotemporal approach to estimate encounters  
74 between potential mates from observations of the movement behavior of male and female *Anolis*  
75 *sagrei* lizards. Our first goal is to investigate if females encounter multiple males, which could offer  
76 females the possibility of mate choice. This possibility has previously been considered unlikely in  
77 most anoles, which have widely been described as having a territorial social system in which males  
78 defend an exclusive, fixed space that contain female territories, implying that while males may mate  
79 with multiple females, most females mate with just the single male in whose territory they reside.  
80 This description of *Anolis* as territorial and polygynous persists despite genetic data revealing  
81 widespread female multiple mating (reviewed in [21]). Our second goal is to characterize sexual  
82 selection in this population by examining the predictors of male reproductive success at two levels.  
83 First we ask if the number of potential mates encountered by males is associated with their  
84 phenotype (the spatial extent of their movement and body size). Second, we test three hypotheses to  
85 understand the phenotypic differences between potential mates and actual mates. We first examine if  
86 females bear offspring sired by the males they encounter more often [22]. Then, we ask if males  
87 encountered later in the breeding season are more likely to sire offspring than males encountered  
88 earlier (“last-male precedence”; [23]). Finally, given widespread sexual selection in animals for larger

89 males [24] as well as pronounced male-biased sexual size dimorphism in *A. sagrei*, we ask if females  
90 disproportionately bear offspring sired by larger males.

91

## 92 **Methods**

### 93 *Field sampling and egg collection*

94 *Anolis sagrei* is a low-perching arboreal lizard native to Cuba and the Bahamas that has been  
95 established in Florida for nearly a century [25, 26]. Lizards were captured, marked, and monitored to  
96 estimate their movement patterns in the University Gardens on the University of Florida campus in  
97 Gainesville, FL, from March 4, 2015 to May 25, 2015 between 0900 and 1800 hours. Sampling  
98 began at the start of the breeding season when lizard activity increased post-winter, and concluded at  
99 about the time when female *A. sagrei* began laying eggs (based on our 2014 observations of  
100 hatchlings appearing at the end of June, after an approximately month long incubation period [27]).  
101 We caught most lizards within a 7140 m<sup>2</sup> area and marked captured individuals with unique bead  
102 tags [28], which allowed us to subsequently observe and identify individuals from a distance without  
103 disturbing them (in total, 4% of observations were of unmarked individuals). When captured, we  
104 measured each individual's snout-vent length (SVL) as a measure of body size, and removed ~2-3  
105 cm of tail tissue for genetic analysis. At each subsequent observation of a lizard, we noted its identity  
106 and the time of the observation. We avoided observing the same individual more frequently than  
107 once per hour, allowing ample time for lizards to resume normal behavior if disturbed by us. At each  
108 observation, we also recorded the lizard's spatial location (usually a tree; in areas of continuous  
109 vegetation, locations > 1m apart were considered distinct). Locations at which lizards were seen  
110 were mapped by triangulation based on measuring distances between locations. We also mapped the  
111 locations of all trees within the site at which lizards were not observed; we could thus include all  
112 trees to which a lizard could potentially have moved in our estimations of movement patterns  
113 (Figure S1). Approximately once a month, we recaptured and re-measured males to estimate the  
114 average growth rate of males in this population.

115 At the end of the observation period, we captured 36 marked females and housed them  
116 singly under established anole husbandry conditions [29] until mid-November. Each cage contained  
117 a pot of soil in which the resident female laid eggs fertilized by sperm stored from her copulations in

118 the field. Eggs were incubated for two to ten days, after which embryos were dissected out for  
119 genetic analysis.

### 120 *Movement pattern analysis*

121 Analyses were carried out in R v. 3.3.2 [30]. We used a discrete-time Markov chain to model  
122 lizards' movements between mapped locations. We divided daytime hours (0800 to 2000 hours;  
123 anoles are diurnal, so we assumed that the lizards did not move at night) over the sampling period  
124 (83 days) into 996 hour-long blocks. Observations were assigned to the bin closest to the time of the  
125 observation. Transition probabilities ( $P_{ij}$ ) between locations  $i$  and  $j$  were modelled as exponentially  
126 declining with the distance between the locations ( $d_{ij}$ ), with rows of the transition matrix then  
127 normalized to sum to one ( $N$  is the total number of locations):

$$128 \quad P_{ij} = \frac{e^{-\lambda d_{ij}}}{\sum_{j=1}^N e^{-\lambda d_{ij}}} \quad (\text{Equation 1})$$

129 In other words, lizards were modelled as less likely to move to distant locations than to close  
130 locations, with a total probability of 1 of moving from each location to *some* location within the site,  
131 including staying at the same location. The value of the exponential decline parameter  $\lambda$  was  
132 estimated by maximizing the likelihood of the observed data (including only pairs of consecutive  
133 observations of lizards, i.e. no assumptions were made while fitting the model regarding mortality or  
134 emigration after the last observation of a lizard) using the *bbmle* package [31]; separate models were  
135 fit for males and females.

136 Next, we used this Markov chain model describing the probabilities of lizards moving from  
137 one location to another to infer the probability that a lizard was at a particular location at a particular  
138 hour. Methodological details are provided in the Supplementary Information, but briefly, this  
139 probability depended on both where that lizard was seen previously and where it was seen next. We  
140 thus calculated, for each lizard, a matrix of probabilities that the lizard occupied a particular location  
141 at a particular hour, for all locations and hours. Rows of this matrix were normalized to one. Then,  
142 we performed element-wise multiplication of pairs of these matrices to calculate the probability of  
143 co-occurrence at each one hour-long time bin, for every possible pair of lizards. Encounters were  
144 categorized for each pair at each hour (“yes/no”) from these co-occurrence probabilities by setting  
145 cutoffs, i.e. pairs were classified as encountering one another if their co-occurrence probability was  
146 above the cutoff. We based cutoffs on the co-occurrence probabilities calculated for “observed

147 encounters,” defined as pairs of lizards observed at the same location within an hour of one another.  
148 Cutoffs for classifying encounters between a pair of lizards depended on the connectedness of the  
149 locations at which these lizards were observed (i.e. the locations’ proximity to nearby locations; see  
150 Supplementary Information for details).

151 To quantify potential mating opportunities for each individual, we calculated the number of  
152 females encountered by each male and the number of males encountered by each female, as  
153 estimated by our model. The proportion of females that encounter multiple males and the mean  
154 number of males encountered by females reveal the extent to which multiple mating by females is  
155 possible in this population.

156 We quantified the spatial extent of an individual’s movement by calculating the mean of the  
157 distances from each observation of the individual to the centroid of all observations of the  
158 individual (mean distance from centroid). Lower mean distance from the centroid indicates smaller  
159 spatial extent. We jittered points randomly within a 0.5 m radius along both the X and Y axis of our  
160 site before calculating mean distance from the centroid, to account for the 1 m resolution at which  
161 locations were mapped.

162 We estimated a growth curve for males by fitting a logistic equation using nonlinear least  
163 squares regression [32] to males’ SVL measured initially and at recaptures, pooling data across all  
164 recaptured males (see Supplementary Information). We used this logistic growth curve to estimate  
165 the SVL of each male on the day of each of his inferred encounters, based on his SVL at the nearest  
166 capture, to test for sexual selection on male body size and for male avoidance of size-matched males  
167 (see below).

#### 168 *Parentage analysis*

169 DNA was extracted from the 36 females housed in captivity, all 161 sampled males, and 383  
170 offspring using an AutogenPrep 965. Six microsatellite regions were amplified for these individuals  
171 (see Table S1 for primer and amplification protocol details; [33, 34]). Alleles were scored manually  
172 after examining chromatogram peaks in Geneious v10.0.9 [35].

173 Parentage analyses were performed in CERVUS v3.0.7 [36]. High proportions of null alleles  
174 were estimated at three loci (Table S1); following [37, 38], we retained these loci in the analysis but  
175 typed apparent homozygotes at only one allele, with the other allele coded as missing. All offspring

176 had known mothers, and males estimated to have encountered the mother of a given offspring were  
177 considered candidate sires for that offspring. Further analyses (reported in the Supplementary  
178 Information) showed that simply restricting the number of candidate sires relative to the whole  
179 population did not inflate paternity assignments and that results of downstream analyses were  
180 unaffected by accounting for discordance between this analysis and an analysis where all males were  
181 provided as candidate fathers. In the simulation to determine log-likelihood ratio (LOD) cutoffs for  
182 paternity assignment, we provided a genotyping error rate of 0.01 (based on mother-offspring  
183 mismatch across all loci); the proportion of loci typed was 0.81. Simulations were run with 23  
184 candidate sires and the proportion of sires typed set to 0.75, based on the maximum number of  
185 males encountered by any female in the population (17 males). These parameters were chosen after  
186 running preliminary analyses with simulations in which the proportion of sires typed was set to 0.25,  
187 0.5, or 0.75 and the number of candidate sires set correspondingly to 68, 34, or 23; we chose the  
188 parameter combination with the closest match between the proportion of sires typed and the  
189 observed assignment rate [39].

#### 190 *Hypothesis Testing*

191 The number of potential mates encountered and spatial extent (mean distance to the  
192 centroid) had right-skewed distributions, and were log-transformed before parametric analyses; SVL  
193 was analyzed untransformed. T-tests and regressions were weighted by the number of observations  
194 per individual. We compared spatial extent between males and females using a t-test, and  
195 investigated if variation in males' spatial extent was related to body size, using a linear regression of  
196 SVL at first capture vs. mean distance to the centroid.

197 Next, we examined if the number of females encountered by males varied with the spatial  
198 extent of males' movement (mean distance from the centroid) and with mean male body size at their  
199 encounters with females, using a multiple linear regression.

200 To assess if males avoided size-matched males, we compared the differences in estimated  
201 SVL between pairs of males estimated to encounter one another vs. the differences in estimated  
202 SVL between randomly chosen pairs of males. For males that were estimated to encounter one  
203 another, we used the logistic growth curve to estimate their SVL on the day of the encounter. We  
204 initially sampled five random pairs per pair of males estimated to encounter one another, estimated  
205 their SVLs on the same day as the corresponding encounter, and eliminated random pairs in which

206 either individual had an estimated SVL less than the minimum observed SVL. We then repeated this  
207 random sampling a total of 3000 times to assess if the number of male-male encounters among size-  
208 matched males (estimated SVL difference of 0-2 mm) was significantly lower than expected by  
209 chance.

210 We used a resampling approach to examine whether (1) males who sired individual females'  
211 offspring encountered the mother significantly more often than males who encountered the same  
212 females but did not sire offspring (encounter rate hypothesis), (2) males who sired individual  
213 females' offspring encountered those females later than males who encountered the same females  
214 but did not sire offspring (last-male precedence hypothesis) and (3) males who sired individual  
215 females' offspring were bigger than males who encountered the same females but did not sire  
216 offspring (body size hypothesis).

217 We first calculated the difference between means of the number of encounters between  
218 male-female pairs for sires and non-sires across all offspring. We also calculated, for each male-  
219 female pair, the last hour at which the pair encountered one another and the maximum SVL  
220 estimated for the male across all encounters between the pair as an measure of male body size, and  
221 then calculated the difference between mean hour of last encounter and mean body size between  
222 sires and non-sires. We then recalculated these differences between means after randomly assigning  
223 each offspring a sire from the set of males that encountered the mother of that offspring. Random  
224 sire assignments were performed in two ways. To address the encounter rate hypothesis, we sampled  
225 uniformly from the list of males encountered by each mother. Then, to address the last-male  
226 precedence and body size hypotheses, we sampled in proportion to the rate at which each male  
227 encountered each mother. The former allowed us to test if sires encountered mothers more often  
228 than did non-sires, and the latter allowed us to test if later-encountered males and bigger males sired  
229 offspring more often than earlier-encountered males and smaller males, after accounting for  
230 variation across males in encounter rates. Each resampling was repeated 10000 times.

231

## 232 **Results**

233 A total of 253 individuals (161 males, 92 females) were caught and marked during the  
234 sampling period, and were observed a total of 5629 times. The number of observations per



235 individual ranged from one to 128; the median number of observations per individual was 11 for  
236 males and 15 for females. An example of two individuals' locations through time is shown in Figure  
237 1.

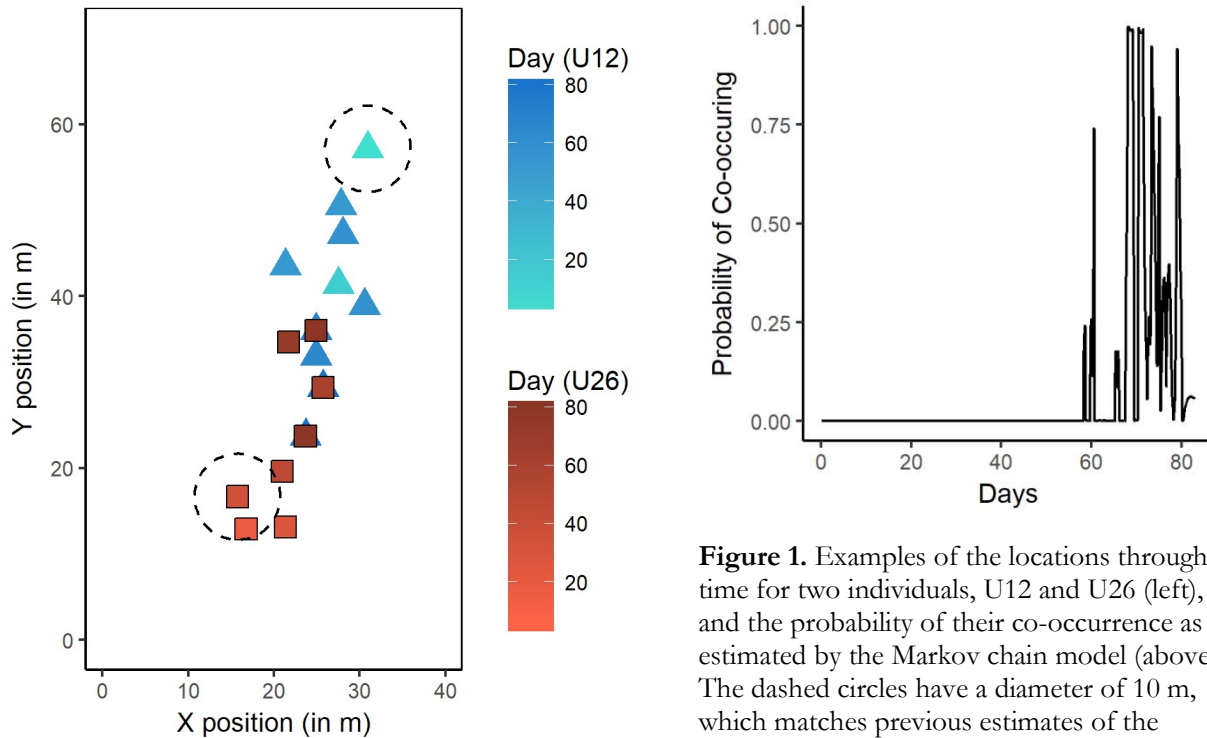

**Figure 1.** Examples of the locations through time for two individuals, U12 and U26 (left), and the probability of their co-occurrence as estimated by the Markov chain model (above). The dashed circles have a diameter of 10 m, which matches previous estimates of the territory size of male *Anolis sagrei*.

238

239 We used a Markov chain to model lizards' movements between locations in the site, where  
240 transition probabilities were modelled as exponentially declining with the distance between locations.  
241 We estimated  $\lambda$  values of -0.78 for males and -1.27 for females (see Equation 1), indicating that  
242 males were more likely than females to move longer distances. Using this Markov chain model to  
243 estimate individuals' movement patterns and thereafter the probabilities of their co-occurrence (see  
244 Figure 1 for an example), we calculated that females encountered  $5.1 \pm 3.7$  males (mean  $\pm$  S.D.) and  
245 males encountered  $2.9 \pm 3.0$  females; 78% of females and 60% of males encountered multiple  
246 individuals of the opposite sex (Figure 2). Males encountered  $4.5 \pm 3.6$  other males.

247 The mean distance from the centroid of all of an individual's locations ranged from 0.2 m to  
248 41.3 m for males and from 0.2 m to 20.8 m for females (mean  $\pm$  standard deviation for males vs.  
249 females:  $6.8 \pm 7.0$  m vs.  $2.7 \pm 3.3$  m;  $t = 8.1$ ,  $df = 208.7$ ,  $P < 0.001$ ). This measure of spatial extent  
250 was weakly associated with SVL at initial capture for males ( $r^2 = 0.04$ ,  $F_{1,135} = 4.91$ ,  $P = 0.03$ ).

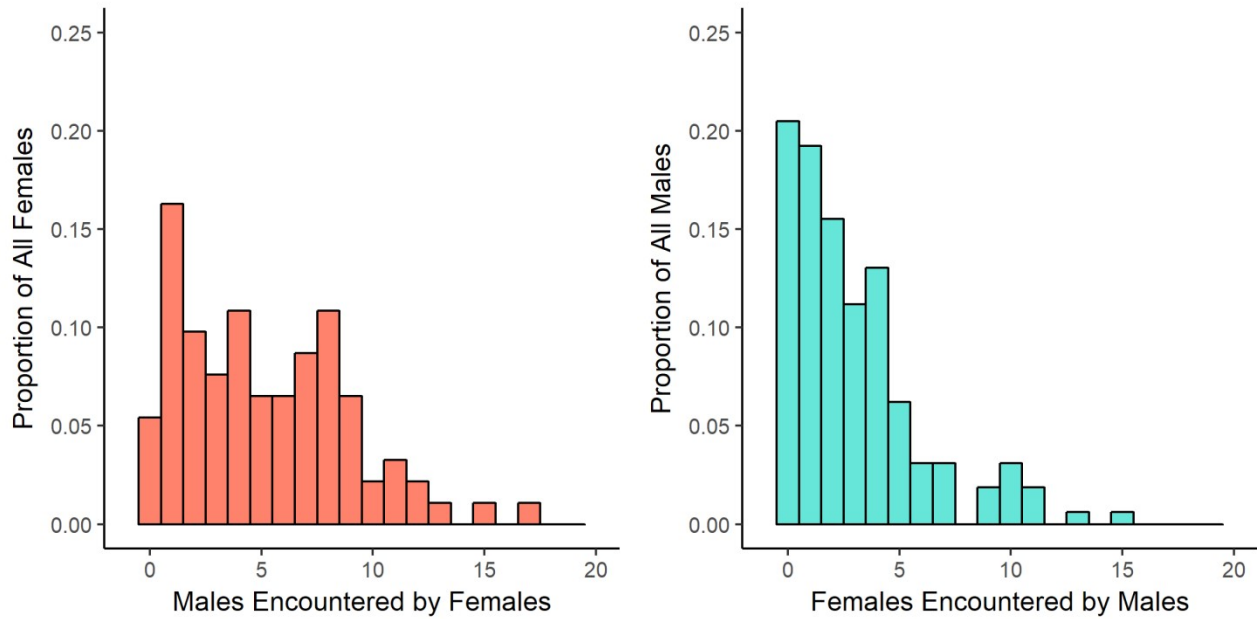

**Figure 2.** Histograms of the number of males encountered by females (left) and females encountered by males (right).

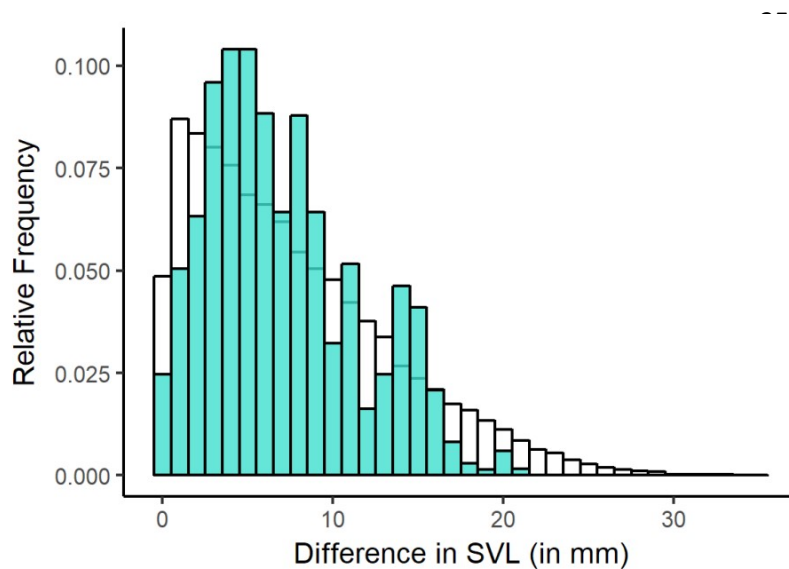

**Figure 3.** Estimated SVL differences between male pairs estimated to co-occur (blue bars), compared with pairwise SVL differences between randomly chosen pairs of males, with random males' sizes estimated on the same days at the observed co-occurrences (white bars).

--- To estimate male body size at their encounters with females using a logistic growth curve, we recaptured 68 males and re-measured their SVLs a total of 94 times, with  $32 \pm 15$  (mean  $\pm$  SD) days elapsed between measurements. The mean difference in estimated SVL between pairs of males estimated to encounter one another ( $7.1 \pm 4.5$  mm) was comparable to the mean difference between randomly chosen pairs of males ( $7.4 \pm$

266 5.7 mm). However, observed size differences were underrepresented in the smallest (0-2 mm)  
 267 category compared to random pairwise size differences ( $0.11$  vs.  $0.18 \pm 0.002$ ;  $P < 0.0003$ ; Figure 3).

268 Males that encountered more females had a greater spatial extent ( $r^2 = 0.10$ ,  $F_{1,113} = 13.0$ ,  $P$   
269  $<0.001$ ; Figure 4) and were larger in size on average at their encounters with females ( $r^2 = 0.09$ ,  $F_{1,113}$   
270  $= 13.0$ ,  $P <0.001$ ; Figure 4); the interaction between spatial extent and SVL was not significant ( $r^2 =$   
271  $0.0$ ,  $F_{1,113} = 0.03$ ,  $P = 0.87$ )

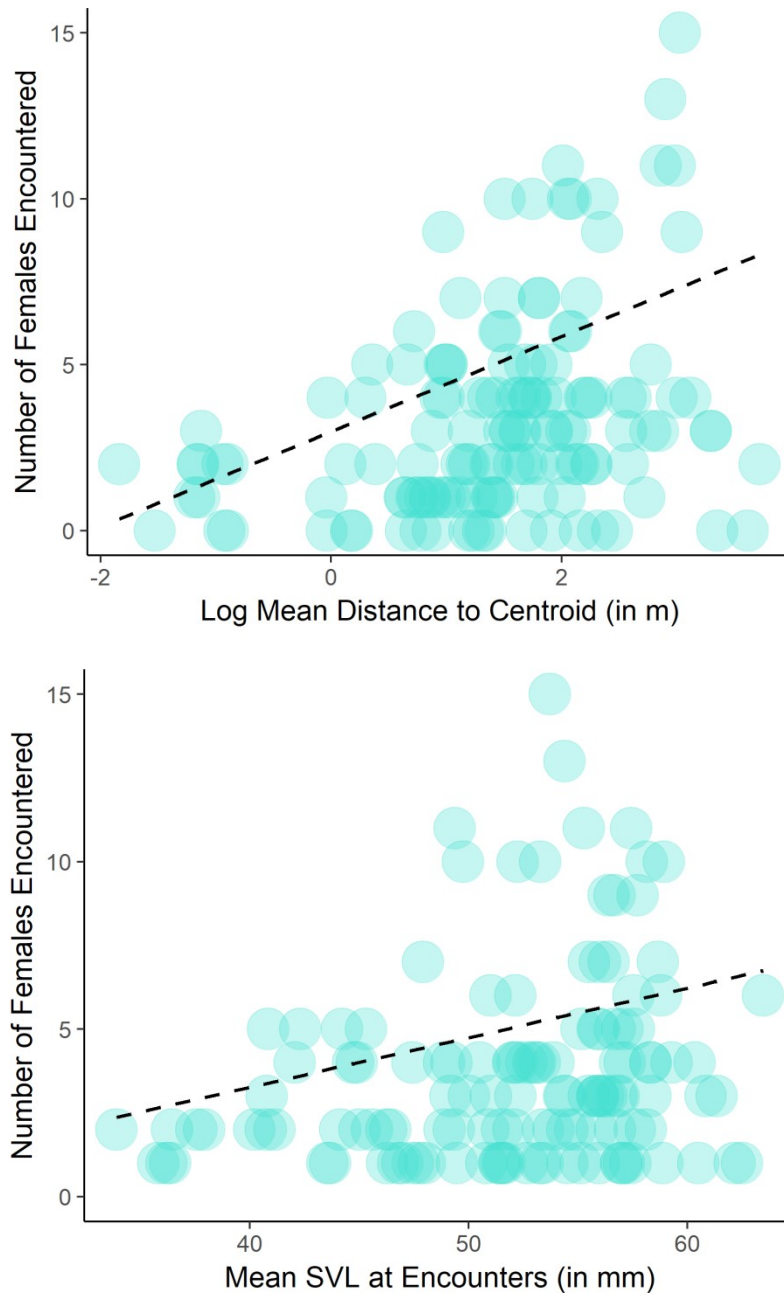

**Figure 4.** Relationship between the number of females encountered by males and the males' spatial extent (top; measured as the mean distance to the centroid) and males' mean estimated SVL across encounters (bottom).

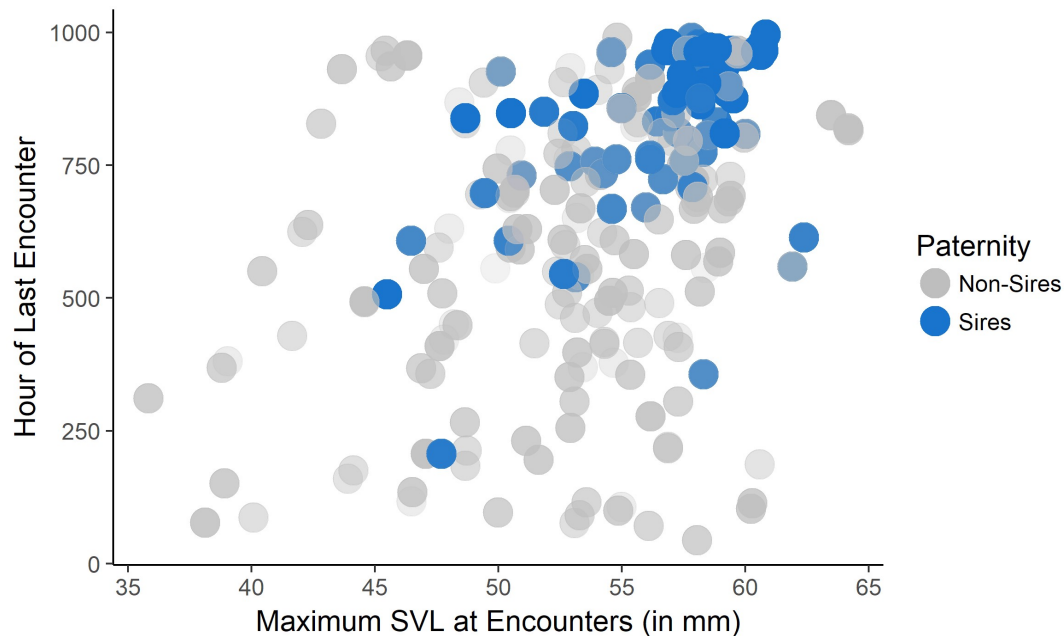

**Figure 5.** Maximum male snout-vent length (SVL) and the hour of last encounter for male-female pairs, colored by whether or not the male sired any of the female's offspring.

272

273 Paternity was assigned to 84% of all offspring (323 individuals) at an 80% confidence level.  
274 We found that 64% of mothers bore offspring sired by more than one male; including offspring  
275 with unassigned sires, this proportion rose to 81%. Using a resampling approach to calculate p-  
276 values, we found that sires of offspring encountered mothers significantly more often than did non-  
277 sires (mean number of encounters between mothers and sires:  $102 \pm 140$ ; non-sires:  $40 \pm 65$ ;  $P <$   
278  $0.0001$ ). Accounting for variation across males in how often they encounter mothers, we found that  
279 sires encountered females significantly later than non-sires (mean  $\pm$  SD of the last hour of encounter  
280 for sires:  $892 \pm 110$ ; non-sires:  $605 \pm 258$ ;  $P < 0.0001$ ) and were significantly bigger than non-sires  
281 (mean  $\pm$  SD of the maximum male SVL across encounters for male-female pairs, for sires:  $57.8 \pm$   
282  $3.0$  mm; non-sires:  $53.2 \pm 5.6$  mm;  $P < 0.0001$ ; Figure 5).

283

## 284 Discussion

285 How animals move through space determines how many and which other individuals they  
286 encounter, setting the stage for all subsequent social and reproductive interactions and ultimately  
287 determining reproductive success. Understanding animals' movement patterns and the encounters

288 they bring about is thus a key step in characterizing a population's mating system, and is essential for  
289 determining how behavior both facilitates and is subject to sexual selection. Our spatiotemporal  
290 characterization of the movement patterns of a population of *A. sagrei* lizards revealed not only that  
291 a majority of males (60%) encountered multiple females but also that most females (78%)  
292 encountered multiple males over the first three months of the breeding season, indicating the  
293 potential in *A. sagrei* for complex polygynandrous mating patterns with ample scope for female  
294 choice.

295 Consistent with previous genetic descriptions of anole mating systems [40–42], we found  
296 that most females (64%–81%) bore offspring sired by more than one male. However, our results are  
297 at odds with most previous behavioral descriptions of movement patterns and mating systems in  
298 *Anolis* lizards, which leaned heavily on, and were constrained by, the framework of territoriality  
299 (reviewed in [21]). These behavioral descriptions were often coupled with an implicit expectation  
300 that anoles mate in a strictly polygynous manner, i.e., males mate with multiple females, but females  
301 mate with just the one male in whose territory they reside. Consequently, field studies have often  
302 implied that the opportunity for female choice in anoles is limited because it is precluded by  
303 territoriality (e.g. [43–45], but see [46]). Concurrently, despite varying evidence as to whether female  
304 choice is possible in natural populations, laboratory studies have offered females the choice between  
305 males to assess precopulatory mate preference [47–49] and have mated females with multiple males  
306 to assess postcopulatory sexual selection [50, 51]. Our results indicate that female anoles definitely  
307 have the opportunity to exercise post-copulatory mate choice and might also exercise pre-copulatory  
308 mate choice, calling into question the utility of territorial polygyny as a description of these lizards'  
309 mating system.

310 Though rarely defined explicitly, territoriality is most often taken to mean the defense of an  
311 exclusive area in a fixed spatial location (reviewed in [52]). The inclusion of both exclusivity and site  
312 fidelity in the definition of territoriality is *necessary* for polygyny to be implied by territoriality.  
313 Departures from strict polygyny, as seen here and previously in anoles [40–42], imply departures  
314 from strict territoriality. While other definitions of territoriality, particularly those omitting site  
315 fidelity, could replace strict territoriality as a description of anole space use, these definitions do not  
316 imply strict polygyny, and indeed, make relatively few direct predictions about populations' mating  
317 systems. We suggest that rather than trying to shoehorn descriptions of behavior into difficult-to-  
318 define concepts such as territoriality, we can reconcile widespread discrepancies between behavioral

319 and genetic descriptions of mating systems by re-examining and quantifying animals' movement and  
320 social behaviors as sequential steps in the process of sexual selection.

321 In territorial species, such re-examinations could further prompt us to revisit explanations of  
322 behaviors that have long been interpreted as characteristic of territorial polygyny, to discern if they  
323 might also be consistent with female choice. For example, we found that males encounter size-  
324 matched males less often than expected at random, which is consistent with male body size  
325 determining the outcome of male-male fights over territory ownership and access to mates [53, 54]  
326 and larger males subsequently excluding other large males from their territories [55, 56]. In this  
327 context of territoriality, smaller males are hypothesized to evade detection by larger territorial males,  
328 residing in their territories and attempting to 'sneak' copulations with resident females. But in taxa  
329 where females choose mates based on male body size (as is possible here; see below), larger males  
330 that retain smaller neighbors can accrue a mating advantage compared to males with neighbors of  
331 equal size (e.g. [57, 58]). Thus, males may engage in agonistic interactions to exclude size-matched  
332 but not smaller males from their vicinity, arranging themselves spatially relative to other males in a  
333 manner that raises their likelihood of being selected by females [59].

334 That said, our results support long-standing views about some facets of territoriality [52]. We  
335 found that males had a greater spatial extent than females, consistent with previous estimates of sex  
336 differences in territory size (e.g. [60, 61]), and with evidence for male-biased dispersal in anoles [62,  
337 63]. But the spatial extent of individuals in this population is substantially higher than previous  
338 estimates of territory size in this and ecologically similar species (e.g.  $\sim 3 \text{ m}^2$  for females and  $\sim 10 \text{ m}^2$   
339 to  $\sim 14 \text{ m}^2$  for males [60, 64, 65], compared with mean minimum convex polygons areas of  $36 \text{ m}^2$  for  
340 females and  $225 \text{ m}^2$  for males in this study). Although it is possible that lizards in our site behaved  
341 unusually, the discrepancy may also partly be due to limited spatial and temporal sampling in  
342 previous studies, leading to underestimates of anole space use and interactions (reviewed in [21]).  
343 Indeed, subsampling from our dataset shows that if we had limited our spatial or temporal sampling  
344 extent to match the median sampling of previous studies, we would have detected a greatly reduced  
345 number of male-female pairs with overlapping home ranges (see Supplementary Information). In  
346 sum, we posit that while certain tenets of territoriality are well-supported in anoles, previous studies  
347 have likely underestimated the complexity of *Anolis* lizards' movement patterns and social  
348 interactions by being constrained by a territorial framework. It remains unknown if similar problems  
349 afflict other species that have long been described as territorial.

350           Larger males not only encountered more females but were also more likely to sire offspring  
351 than smaller males, suggesting strong sexual selection for larger body size in male *A. sagrei*. These  
352 results are consistent with evidence across taxa that body size predicts male reproductive success  
353 [24]. However, most previous evidence in favor of this hypothesis in anoles is based on estimating  
354 mating patterns from home range area and overlap within the framework of territoriality (e.g. [60,  
355 66, 67]. Our results show that the pattern of sexual selection favoring larger males is recovered even  
356 without a territorial interpretation of these lizards' movement. As a species with largely  
357 indeterminate growth, body size can be an indicator of age [43, 68], or the ability to survive and  
358 thrive, suggesting an adaptive reason for females to choose to mate with, or bear offspring sired by,  
359 larger males [69]. However, selection on body size is difficult to disentangle from last-male  
360 precedence [23]—because males are smaller at earlier times in the breeding season, it is possible that  
361 large males sire more offspring simply because they have encountered and mated with females more  
362 recently.

363           Additionally, sexual selection may act on movement behavior—males with larger spatial  
364 extents encountered more females than males with smaller spatial extents. Because male body size  
365 and spatial extent were only very weakly correlated, the results do not indicate strong ontogenetic  
366 shifts in movement behavior. Thus, it appears that there are multiple ways for males to achieve  
367 reproductive success—they can grow large, they can traverse large areas, or both [70].

368           However, understanding the combined effects of body size, spatial extent, and last-male  
369 precedence is not necessarily straightforward—a single movement or mating strategy is unlikely to  
370 be adaptive in the face of social complexity. Instead, animals may make decisions about movement  
371 depending on their social and environmental context, rather than of adopting fixed patterns of  
372 space-use [5, 7, 8]. Such context-dependent decision making is often referred to as the maintenance  
373 of “alternative mating strategies,” though this variation need not be strictly discrete (e.g. [70, 71]).  
374 Individual-based models that incorporate the various sequential, compounding influences on  
375 reproductive success could reveal if males can make adaptive, context-dependent decisions to move  
376 or stay at particular locations based on their phenotype and the social and environmental situations  
377 they find themselves in.

378           Discerning if the decision rules used by individuals in a species are consistent across habitats  
379 and populations may represent a promising way of describing animal mating systems [72, 73]. In the

380 future, sampling across populations and species that vary in density, sex ratio, and habitat structure  
381 will be essential to understanding how anoles' decision rules regarding movement shape their mating  
382 system. The Markov chain approach to modelling movement patterns and estimating interactions  
383 presented here could be improved in such studies by incorporating both social and environmental  
384 variation influencing these decision rules—transition probabilities between locations could be scaled  
385 according to habitat preferences or the occupancy of a location by specific individuals, for example.  
386 At present, the accuracy of our estimation of encounters is limited by modeling movements as only  
387 based on distances between locations. Moreover, our approach is restricted to taxa that move  
388 relatively infrequently between relatively discrete locations, and cannot be readily modified for taxa  
389 with more continuous movement.

390         Finer spatial and temporal scales of location sampling, made possible with automated  
391 methods of tracking animals in the wild [74], could also allow for individual-level parameterization  
392 of any movement model, and would almost certainly improve the accuracy with which encounters  
393 are estimated. At present, a majority of the encounters (~70%) estimated by our model occur on the  
394 same day as a known observation of a lizard in the pair. This suggests that our model does not  
395 extrapolate unreasonably, but also shows that our discovery of these animals' behavior remains  
396 limited by sampling. Ultimately, however, even finer scale location sampling will be insufficient for  
397 determining which encounters in fact lead to matings—discovering this crucial aspect of animals'  
398 behavior will depend on focal animal observations of encounters in natural or naturalistic  
399 conditions. For a male, the gap between encountering a female and siring her offspring can include  
400 the sequential gauntlets of male-male competition, female mating preferences, and post-copulatory  
401 competition and choice [1, 2]. Disentangling effects on mating success at these various levels will be  
402 essential to fully understanding how sexual selection shapes behavior, and will require close  
403 observation of animal interactions prior to and including mating [75–77].

404         However, movement behavior is a precursor to bringing about any of these interactions—it  
405 comprises the first step of sexual selection and its quantification is therefore necessary for  
406 understanding the shape that sexual selection can take. In this paper, we develop a spatiotemporal  
407 framework to quantify movement behavior to estimate encounters between potential mates. This  
408 framework reveals an infrequently-recognized opportunity for female mate choice in *Anolis sagrei*,  
409 demonstrates that larger males are favored across multiple levels of sexual selection, and shows  
410 evidence for sexual selection on movement behavior and the timing of male-female encounters. We



411 hope that similar frameworks centered on movement behavior can help to organize disparate studies  
412 that approach sexual selection at different levels in a variety of animal taxa.

413

#### 414 **Acknowledgements**

415 Jonathan Suh, Claire Dufour, Rachel Moon, Bonnie Kircher, and Barbara Tamires de  
416 Silveira assisted with data collection. Thom Sanger, Tom Wichman, Steve Johnson, and Stuart  
417 McDaniel provided logistical support. Thom Sanger additionally advised on lizard husbandry and  
418 embryo collection. Hanna Wegener, Jason Kolbe, Anthony Geneva, and Pavitra Muralidhar advised  
419 on the genetic methods and analyses. Ben de Bivort, Edward Burnell and Colin Donihue advised on  
420 the statistical analyses and, along with Yoel Stuart, Pavitra Muralidhar, Locke Rowe, Meera Lee  
421 Sethi, Cyndi Casey, and several anonymous reviewers, provided comments that improved the  
422 manuscript.

423 **Use of animals and field studies:** This work was carried out under permit EXOT-15-09 from the  
424 U.S. Fish and Wildlife Service, and all procedures were approved under IACUC Protocol 26-11.

425 **Statement of Authorship:** AK and JBL designed the study, AK collected data and performed  
426 analyses, AK and JBL wrote the manuscript.

427 **Data Accessibility Statement:** data and code have been uploaded to Dryad (10.5061/dryad.kt387)  
428 and are currently available on GitHub (<https://github.com/ambikamath/anolismovt>).

429 **Competing Interests:** the authors have no competing interests

430 **Funding:** This project was funded by a Young Explorers Grant from the National Geographic  
431 Society, a student research grant from the Animal Behavior Society, the Robert A. Chapman  
432 Memorial Scholarship from Harvard University, and the John Templeton Foundation.

## 433 References

- 434 1. Wiley RH, Poston J. 1996 Indirect mate choice, competition for mates, and coevolution of  
435 the sexes. *Evolution*, **50**, 1371–1381. (doi: 10.1111/j.1558-5646.1996.tb03911.x)
- 436 2. Bonduriansky, R. 2003 Layered sexual selection: a comparative analysis of sexual behaviour  
437 within an assemblage of piophilid flies. *Can. J. Zool.*, **81**, 479–491.
- 438 3. Wagner Jr. WE. 1998 Measuring female mating preferences. *Anim. Behav.*, **55**, 1029–1042.  
439 (doi: 10.1006/anbe.1997.0635)
- 440 4. Kvarnemo C, Simmons L. 2013. Polyandry as a mediator of sexual selection before and after  
441 mating. *Phil. Trans. R. Soc. B*, **368**, 20120042. (doi: 10.1098/rstb.2012.0042)
- 442 5. Uy JAC, Patricelli GL, Borgia G. 2000. Dynamic mate-searching tactic allows female satin  
443 bowerbirds *Ptilonorhynchus violaceus* to reduce searching. *Proc. R. Soc. Lond. B*, **267**, 251–256.
- 444 6. Jones AG. 2009 On the opportunity for sexual selection, the Bateman gradient and the  
445 maximum intensity of sexual selection. *Evolution*, **63**, 1673–1684. (doi: 10.1111/j.1558-  
446 5646.2009.00664.x)
- 447 7. Dunn PO, Whittingham LA. 2006 Search costs influence the spatial distribution, but not the  
448 level, of extra-pair mating in tree swallows. *Behav. Ecol. Sociobiol.*, **61**, 449–454. (doi:  
449 10.1007/s00265-006-0272-3)
- 450 8. DuVal EH, Kapoor JA. 2015 Causes and consequences of variation in female mate search  
451 investment in a lekking bird. *Behav. Ecol.*, **26**, 1537–1547. (doi: 10.1093/beheco/arv110)
- 452 9. Jones AG, Ratterman NL. 2009 Mate choice and sexual selection: What have we learned  
453 since Darwin? *Proc. Nat. Acad. Sci.*, **106**, 10001–10008. (doi: 10.1073/pnas.0901129106)
- 454 10. Dougherty LR, Shuker DM. 2015 The effect of experimental design on the measurement of  
455 mate choice: a meta-analysis. *Behav. Ecol.*, **26**, 311–319. (doi:10.1093/beheco/aru125)
- 456 11. Firman RC, Gasparini C, Manier MK, Pizzari T. 2017 Postmating female control: 20 years of  
457 cryptic female choice. *Trends Ecol. Evol.* **32**, 368–382. (doi: 10.1016/j.tree.2017.02.010)
- 458 12. Morris MR. 1989 Female choice of large males in the treefrog *Hyla chrysoscelis*: the importance  
459 of identifying the scale of choice. *Behav. Ecol. Sociobiol.*, **25**, 275–281.
- 460 13. Roff DA. 2015 The evolution of mate choice: a dialogue between theory and experiment.  
461 *Ann. N.Y. Acad. Sci.*, **1360**, 1–15. (doi: 10.1111/nyas.12743)
- 462 14. Real L. 1990 Search theory and mate choice. I. Models of single-sex discrimination. *Am.*  
463 *Nat.*, **136**, 376–405. (doi: abs/10.1086/285103)
- 464 15. Shuker DM, Day TH. 2002 Mate sampling and the sexual conflict over mating in seaweed  
465 flies. *Behav. Ecol.*, **13**, 83–86. (doi: 10.1093/beheco/13.1.83)
- 466 16. Hughes C. 1998 Integrating molecular techniques with field methods in studies of social  
467 behavior: A revolution results. *Ecology*, **79**, 383–399. (doi: 10.1890/0012-  
468 9658(1998)079[0383:IMTWFM]2.0.CO;2)
- 469 17. Griffith SC, Owens IPF, Thuman KA. 2002 Extra pair paternity in birds: a review of  
470 interspecific variation and adaptive function. *Mol. Ecol.*, **11**, 2195–2212.
- 471 18. Double M, Cockburn A. 2000 Pre-dawn infidelity: females control extra-pair mating in  
472 superb fairy-wrens. *Proc. R. Soc. Lond. B*, **267**, 465–470. (doi: 10.1098/rspb.2000.1023)
- 473 19. Thom MD, MacDonald DW, Mason GJ, Pedersen V, Johnson PJ. 2004 Female American  
474 mink, *Mustela vison*, mate multiply in a few choice environment. *Anim. Behav.*, **67**, 975–984.  
475 (doi:10.1016/j.anbehav.2003.09.008)
- 476 20. Stopher KV, Nussey DH, Clutton-Brock TH, Guinness F, Morris A, Pemberton JM. 2011.  
477 The red deer rut revisited: female excursions but no evidence females move to mate with  
478 preferred males. *Behav. Ecol.*, **22**, 808–818. (doi: 10.1093/beheco/arr052)

- 479 21. Kamath A, Losos JB. 2017 The erratic and contingent progression of research on  
480 territoriality: a case study. *Behav. Ecol. Sociobiol.*, **71**, 89. (doi: 10.1007/s00265-017-2319-z)
- 481 22. Kokko H, Mappes J. 2012 Multiple mating by females is a natural outcome of a null model  
482 of mate encounters. *Entomol. Exp. Appl.* **146**, 26–37. (doi: 10.1111/j.1570-7458.2012.01296.x)
- 483 23. Birkhead TR, Hunter FM. 1990 Mechanisms of sperm competition. *Trends Ecol. Evol.*, **5**, 48–  
484 52. (doi: 10.1016/0169-5347(90)90047-H)
- 485 24. Andersson M. 1994 *Sexual Selection*. Princeton University Press, Princeton, USA.
- 486 25. Kolbe JJ, Glor RE, Rodríguez-Schettino L, Chamizo Lara AR, Larson A, Losos JB. 2004  
487 Genetic variation increases during biological invasion by a Cuban lizard. *Nature*, **431**, 177–  
488 181. (doi: 10.1038/nature02807)
- 489 26. Kolbe JJ, Larson A, Losos JB, de Queiroz K. 2008 Admixture determines genetic diversity  
490 and population differentiation in the biological invasion of a lizard species. *Biol. Lett.* **4**, 434–  
491 437. (doi: 10.1098/rsbl.2008.0205)
- 492 27. Sanger TJ, Losos JB, Gibson-Brown JJ. 2007 A developmental staging series for the lizard  
493 genus *Anolis*: A new system for the integration of evolution, development, and ecology. *J.*  
494 *Morph.*, **269**, 129–137. (doi: 10.1002/jmor.10563)
- 495 28. Fisher M, Muth, A. 1989 A technique for permanently marking lizards. *Herpetol. Rev.*, **20**, 45–  
496 46.
- 497 29. Sanger TJ, Hime PM, Johnson MJ, Diani J, Losos JB. 2008 Laboratory protocols for  
498 husbandry and embryo collection of *Anolis* lizards. *Herpetol. Rev.*, **39**, 58–63.
- 499 30. R Core Team. 2016 R: A language and environment for statistical computing. R Foundation  
500 for Statistical Computing, Vienna.
- 501 31. Bolker B, R Development Core Team. 2016 bbmle: Tools for General Maximum Likelihood  
502 Estimation. R package version 1.0.18. <https://CRAN.R-project.org/package=bbmle>
- 503 32. Schoener TW, Schoener A. 1978 Estimating and interpreting body-size growth in some  
504 *Anolis* lizards. *Copeia*, **1978**, 390–405.
- 505 33. Bardeleben C, Palchevskiy V, Calsbeek R, Wayne RK. 2004 Isolation of polymorphic  
506 tetranucleotide microsatellite markers for the brown anole (*Anolis sagrei*). *Mol. Ecol. Notes*, **4**,  
507 176–178. (doi: 10.1111/j.1471-8286.2004.00602.x)
- 508 34. Wordley C, Slate J, Stapley J. 2011 Mining online genomic resources in *Anolis carolinensis*  
509 facilitates rapid and inexpensive development of cross-species microsatellite markers for the  
510 *Anolis* lizard genus. *Mol. Ecol. Resour.*, **11**, 126–133. (doi:10.1111/j.1755-0998.2010.02863.x)
- 511 35. Kearse M, Moir R, Wilson A, Stones-Havas S, Cheung M, Sturrock S, Buxton S, Cooper A,  
512 Markowitz S, Duran C, *et al.* 2012 Geneious Basic: an integrated and extendable desktop  
513 software platform for the organization and analysis of sequence data. *Bioinformatics*, **28**, 1647–  
514 1649. (doi: 10.1093/bioinformatics/bts199)
- 515 36. Kalinowski ST, Taper ML, Marshall TC. 2007 Revising how the computer program  
516 CERVUS accommodates genotyping error increases success in paternity assignment. *Mol.*  
517 *Ecol.*, **16**, 1099–1106. (doi: 10.1111/j.1365-294X.2007.03089.x)
- 518 37. Le Bas NR. 2001 Microsatellite determination of male reproductive success in a natural  
519 population of the territorial ornate dragon lizard, *Ctenophorus ornatus*. *Mol. Ecol.*, **10**, 193–203.  
520 (doi: 10.1046/j.1365-294X.2001.01174.x)
- 521 38. Husak JF, Fox SF, Lovern MB, van den Bussche RA. 2006 Faster lizards sire more  
522 offspring: sexual selection on whole-animal performance. *Evolution*, **60**, 2122–2130. (doi:  
523 10.1111/j.0014-3820.2006.tb01849.x)

- 524 39. Rasmussen HB, Okello JBA, Wittemyer G, Siegismund HR, Arctander P, Vollrath F,  
525 Douglas-Hamilton I. 2008 Age- and tactic-related paternity success in male African  
526 elephants. *Behav. Ecol.*, **19**, 9–15. (doi:10.1093/beheco/arm093)
- 527 40. Passek KM. 2002 *Extra-pair paternity within the female-defense polygyny of the lizard, Anolis*  
528 *carolinensis: Evidence of alternative mating strategies*. Dissertation, Virginia Polytechnic Institute,  
529 Blacksburg, USA.
- 530 41. Johnson MA. 2007 *Behavioral ecology of Caribbean Anolis lizards: A comparative approach*.  
531 Dissertation, Washington University, St. Louis, USA.
- 532 42. Calsbeek R, Bonneaud C, Prabhu S, Manoukis N, Smith TB. 2007 Multiple paternity and  
533 sperm storage lead to increased genetic diversity in *Anolis* lizards. *Evol. Ecol. Res.* **9**, 495–503.
- 534 43. Schoener TW, Schoener A. 1980 Densities, sex ratios, and population structure in four  
535 species of Bahamian *Anolis* lizards. *J. Anim. Ecol.*, **49**, 19–53.
- 536 44. Stamps JA. 1983 Sexual selection, sexual dimorphism, and territoriality. In: *Lizard Ecology*.  
537 [eds.] Huey R, Pianka ER, Schoener TW. Harvard University Press, Cambridge, USA, pp  
538 169–204.
- 539 45. Jenssen TA, Lovern MB, Congdon JD. 2001 Field-testing the protandry based mating  
540 system for the lizard, *Anolis carolinensis*: does the model organism have the right model? *Behav.*  
541 *Ecol. Sociobiol.*, **50**, 162–172. (doi: 10.1007/s002650100349)
- 542 46. Tokarz RR. 1998 Mating pattern in the lizard *Anolis sagrei*: Implications for mate choice and  
543 sperm competition. *Herpetologica*, **54**, 388–394.
- 544 47. Andrews RM. 1985 Male choice by females of the lizard, *Anolis carolinensis*. *J. Herpetol.*, **19**,  
545 284–289.
- 546 48. Lailvaux SP, Irschick DJ. 2006 No evidence for female association with high-performance  
547 males in the green anole lizard, *Anolis carolinensis*. *Ethology*, **112**, 707–715. (doi:  
548 10.1111/j.1439-0310.2006.01210.x)
- 549 49. Flanagan SP, Bevier CR. 2014 Do male activity level and territory quality affect female  
550 association time in the brown anole, *Anolis sagrei*? *Ethology*, **120**, 365–374. (doi:  
551 10.1111/eth.12213)
- 552 50. Calsbeek R, Bonneaud C. 2008 Postcopulatory fertilization bias as a form of cryptic sexual  
553 selection. *Evolution*, **62**, 1137–1148. (doi:10.1111/j.1558-5646.2008.00356.x)
- 554 51. Cox RM, Calsbeek R. 2010 Cryptic sex-ratio bias provides indirect genetic benefits despite  
555 sexual conflict. *Science*, **328**, 92–94. (doi: 10.1126/science.1185550)
- 556 52. Maher CR, Lott DF. 1995 Definitions of territoriality used in the study of variation in  
557 vertebrate spacing systems. *Anim. Behav.*, **49**, 1581–1597. (doi: 10.1016/0003-3472(95)90080-  
558 2)
- 559 53. Tokarz RR. 1985 Body size as a factor determining dominance in staged agonistic  
560 encounters between male brown anoles (*Anolis sagrei*). *Anim. Behav.* **33**, 746–753. (doi:  
561 10.1016/S0003-3472(85)80006-3)
- 562 54. Jenssen TA, Decourcy DA, Congdon JD. 2005 Assessment in contests of male lizards  
563 (*Anolis carolinensis*): how should smaller males respond when size matters? *Anim. Behav.*, **69**,  
564 1325–1336. (doi:10.1016/j.anbehav.2004.07.023)
- 565 55. Trivers RL. 1976 Sexual selection and resource-accurring abilities in *Anolis garmani*. *Evolution*,  
566 **30**, 253–269. (doi: 10.1111/j.1558-5646.1976.tb00908.x)
- 567 56. Fleishman LJ. 1988 The social behavior of *Anolis aeneus*, a grass anole from Panama. *J.*  
568 *Herpetol.*, **22**, 13–23.

- 569 57. Callander S, Jennions MD, Backwell PRY. 2011 Female choice over short and long  
570 distances: neighbour effects. *Behav. Ecol. Sociobiol.*, **65**, 2071–2078. (doi: 10.1007/s00265-011-  
571 1216-0)
- 572 58. Callander S, Hayes CL, Jennions MD, Backwell PRY. 2012 Experimental evidence that  
573 immediate neighbors affect male attractiveness. *Behav. Ecol.*, **24**, 730–733. (doi:  
574 10.1093/beheco/ars208)
- 575 59. Höglund J, Johansson T, Pelabon C. 1997. Behaviourally mediated sexual selection:  
576 characteristics of successful male black grouse. *Anim. Behav.*, **54**, 255–264. (doi:  
577 10.1006/anbe.1996.0459)
- 578 60. Schoener TW, Schoener A. 1982 Intraspecific variation in home-range size in some *Anolis*  
579 lizards. *Ecology*, **63**, 809–823. (doi: 10.2307/1936801)
- 580 61. Jenssen TA, Nunez SC. 1998 Spatial and breeding relationships of the lizard, *Anolis*  
581 *carolinensis*: Evidence of intrasexual selection. *Behaviour*, **135**, 981–1003. (doi:  
582 10.1163/156853998792640341)
- 583 62. Johansson H, Surget-Groba Y, Thorpe RS. 2008 Microsatellite data show evidence for male-  
584 biased dispersal in the Caribbean lizard *Anolis roquet*. *Mol. Ecol.*, **17**, 4425–4432. (doi:  
585 10.1111/j.1365-294X.2008.03923.x)
- 586 63. Calsbeek R. 2009 Sex-specific adult dispersal and its selective consequences in the brown  
587 anole, *Anolis sagrei*. *J. Anim. Ecol.*, **78**, 617–624. (doi: 10.1111/j.1365-2656.2009.01527.x)
- 588 64. Rand AS. 1967 Ecology and social organization in the iguanid lizard *Anolis lineatopus*. *Proc.*  
589 *U.S. Nat. Mus.*, **122**, 1–79.
- 590 65. Calsbeek R, Marnocha E. 2006 Context dependent territory defense: The importance of  
591 habitat structure in *Anolis sagrei*. *Ethology*, **112**, 537–543. (doi: 10.1111/j.1439-  
592 0310.2006.01194.x)
- 593 66. Losos JB. 2009 *Lizards in an evolutionary tree*. University of California Press, Berkeley,  
594 California, USA.
- 595 67. Ruby DE. 1984 Male breeding success and differential access to females in *Anolis carolinensis*.  
596 *Herpetologica*, **40**, 272–280.
- 597 68. Stamps JA. 1993 Sexual size dimorphism in species with asymptotic growth after maturity.  
598 *Biol. J. Linn. Soc.*, **50**, 123–145. (doi: 10.1006/bijl.1993.1050)
- 599 69. Cooper Jr WE, Vitt IJ. 1993 Female mate choice of large male broad-headed skinks. *Anim.*  
600 *Behav.*, **45**, 683–693. (doi: 10.1006/anbe.1993.1083)
- 601 70. Noble DWA, Wechmann K, Keogh JS, Whiting MJ. 2013 Behavioral and morphological  
602 traits interact to promote the evolution of alternative reproductive tactics in a lizard. *Am.*  
603 *Nat.*, **182**, 726–742. (doi: 10.1086/673535)
- 604 71. Shine R, Langkilde T, Wall M, Mason RT. 2005 Alternative male mating tactics in garter  
605 snakes, *Thamnophis sirtalis parietalis*. *Anim. Behav.*, **70**, 387–396. (doi:  
606 10.1016/j.anbehav.2005.04.001)
- 607 72. Kirkpatrick M, Rand AS, Ryan MJ. 2006 Mate choice rules in animals. *Anim. Behav.*, **71**,  
608 1215–1225. (doi: 10.1016/j.anbehav.2005.11.010)
- 609 73. Patricelli GL, Krakauer AH, McElreath R. 2011 Assets and tactics in a mating market:  
610 Economic models of negotiation offer insights into animal courtship dynamics on the lek.  
611 *Curr. Zool.*, **57**, 225–236.
- 612 74. Kays R, Crofoot MC, Jetz W, Wikelski M. 2015 Terrestrial animal tracking as an eye on life  
613 and planet. *Science*, **348**, aaa2478. (doi: 10.1126/science.aaa2478)
- 614 75. Wong BB, Candolin U. 2005 How is female mate choice affected by male competition. *Biol.*  
615 *Rev. Camb. Philos. Soc.*, **80**, 559–571. (doi: 10.1017/S1464793105006809)

- 616 76. Stapley J. 2008 Female mountain log skinks are more likely to mate with males that court  
617 more, not males that are dominant. *Anim. Behav.*, **75**, 529–538. (doi:  
618 10.1016/j.anbehav.2007.05.017)  
619 77. Engqvist L. 2009 Should I stay or should I go? Condition- and status-dependent courtship  
620 decisions in the scorpionfly *Panorpa cognata*. *Anim. Behav.* **78**, 491–497. (doi:  
621 10.1016/j.anbehav.2009.05.021)

## 622 Supplementary Information

### 623 *Modelling lizard locations.*

624 As described in the main text, we modelled lizards' movements between locations using a  
625 Markov chain model, where transition probabilities were fitted as exponentially declining with the  
626 distance between locations (Equation 1 in main text). If  $\mathbf{M}$  is the transition matrix of the Markov  
627 chain model, and an individual lizard was observed at location  $A_m$  within hour  $T_m$  and then later at  
628 location  $A_n$  within hour  $T_n$ , then we calculated the probability that that individual was found at a  
629 particular location ( $L$ ) within the hour  $T \in (T_m, \dots, T_n)$  as follows:

$$P(L, T | A_m, T_m, A_n, T_n) = \frac{\mathbf{M}^{T-(T_m)+1}[A_m, L] \times \mathbf{M}^{(T_n)-T+1}[L, A_n]}{\sum_{i=1}^N \mathbf{M}^{T-(T_m)+1}[A_m, A_i] \times \mathbf{M}^{(T_n)-T+1}[A_i, A_n]}$$

630  $N$  is the total number of locations mapped; in our site, we mapped a total of 318 locations,  
631 which included not only locations at which lizards were observed but also trees within the site on  
632 which lizards were not observed but to which they might have moved (Figure S1). For the hours  
633 preceding the first observation and following the last observation for each individual, lizards were  
634 assumed to be equally likely to be anywhere in the site (i.e. the appropriate row or column of the  
635 transition matrix in equation 1 was replaced by a unit vector). This enabled us to include all sampled  
636 lizards, including those observed just once, into our estimation of encounters. It is worth nothing,  
637 though, that individuals with fewer observations contributed less to fitting the overall movement  
638 model than individuals with many observations. In sum, after this procedure, we obtained, for each  
639 lizard, a vector of probabilities of the lizard being in each of the 318 locations within each hour  
640 during the sampling period.

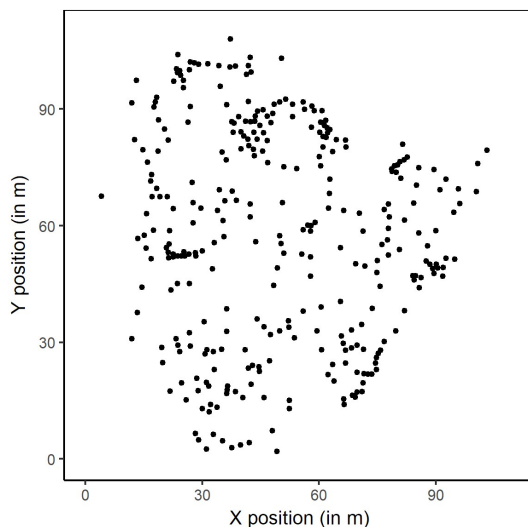

**Figure S1** Map of all locations at which lizards were observed. In areas of continuous vegetation, locations more than 1m apart were considered distinct. We also mapped the location of all trees within the site at which lizards were not observed, to include all trees to which a lizard could potentially have moved in our estimations of their movement patterns, amounting to a total of 318 locations.

641 ***Estimating Encounters***

642 To estimate whether or not a pair of lizards encountered one another, we first performed an  
643 element-wise multiplication of the two matrices of the individuals' probabilities of being at each  
644 location within each hour, and then summed probabilities across all locations for each hour in the  
645 resultant matrix for the pair. Probabilities were summed across locations so that two individuals that  
646 may be moderately likely to co-occur at multiple locations at the same time could still be estimated  
647 as encountering one another at that time.

648 We employed the following rationale and process to categorize encounters (“yes/no”) from  
649 co-occurrence probabilities:

- 650 • We first defined “observed encounters” as occurring between the pair of lizards  
651 observed in the same location as each other, within one hour of each other. We extracted,  
652 from the matrix described above, the co-occurrence probabilities of all observed encounters  
653 ( $n = 1028$ ).
- 654 • Examining the variation in these co-occurrence probabilities of observed encounters,  
655 we noticed that they were related to the connectedness of the locations at which encounters  
656 took place, where connectedness was quantified as the mean distance from a location to the  
657 ten closest locations. Specifically, we saw that the calculated co-occurrence probabilities of  
658 observed encounters are lower for encounters that take place at more connected locations  
659 and higher for encounters at less connected locations (orange points in Figure S2). This is  
660 because when the probability of movement declines with distance, as modeled here, it is  
661 “easier” to leave a location that is close to other locations (i.e. more connected) than it is to  
662 leave a relatively isolated location (i.e. less connected). Consequently, the estimated  
663 probability of remaining at the former location will be lower compared to the probability of  
664 remaining at the latter location.

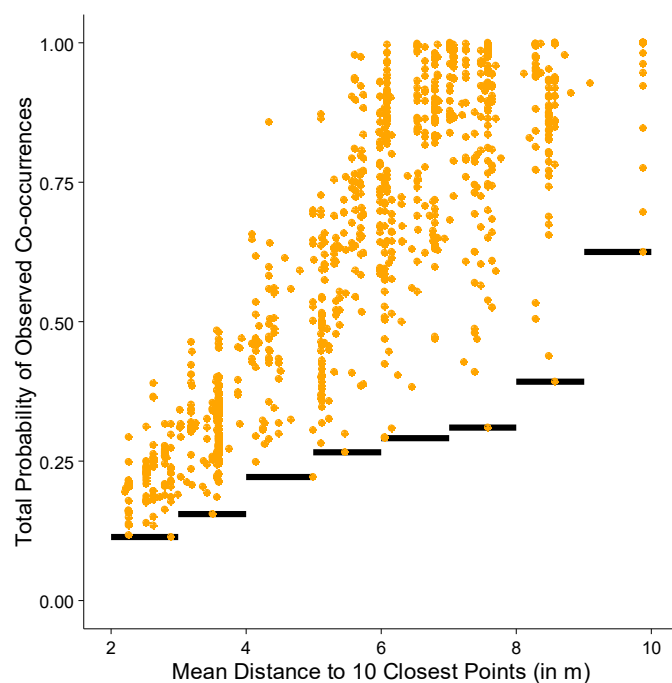

**Figure S2** Cutoffs (black horizontal lines) for defining encounters, based on the mean distance from each location to the ten closest locations. Points indicate the sum of probabilities of co-occurrences across all locations, for pairs of individuals at hours where the two were observed at the same location within an hour of one another.

- 665 • We aimed to set co-occurrence probability cutoffs that would categorize all observed  
666 encounters as encounters, while also being as conservative as possible in converting co-  
667 occurrence probabilities into binary (“yes/no”) encounters. Balancing these two  
668 considerations, we set cutoffs for categorizing encounters on the basis of locations’  
669 connectedness.
- 670 • Specifically, we binned locations on the basis of their connectedness (mean distance  
671 to the ten closest locations), into 1 m increments, and set distinct cutoffs for each bin,  
672 denoted by the black horizontal lines in Figure S2. In each connectedness bin, the cutoff for  
673 categorizing encounters in the remainder of the co-occurrence probability matrix was set to  
674 be the minimum probability calculated for observed co-occurrences in that bin. Had we used  
675 the global minimum of the calculated co-occurrence probabilities of observed encounters as  
676 a cutoff instead of the stepwise-increasing cutoffs described here (i.e. if the cutoff for the  
677 leftmost bin in Figure S2 were the cutoff for all co-occurrence probabilities regardless of  
678 location), we would have ignored the location-specific connectedness dynamics described  
679 above, leading us to infer many more encounters at less-connected locations.
- 680 • Each entry in the co-occurrence probability matrix was then assigned to a bin based  
681 on location connectedness. For all pairs of lizards for all hours in the sampling period, we  
682 considered the previous and next locations at which the lizards in the pair were observed,  
683 and found the minimum of the means of the ten closest distances for these locations.  
684 Depending on which bin this distance fell into, we assigned the appropriate probability  
685 cutoff for categorizing an encounter between that pair of lizards at that hour. If the  
686 calculated co-occurrence probability was higher than this assigned cutoff, the pair of lizards  
687 were categorized as encountering one another at this hour.

688 To assess the sensitivity of the number of male-female encounters to the probability cutoff  
689 described above, we repeated analyses using the 25% quartile instead of the minimum probability in  
690 each bin; a higher cutoff is more stringent, and will recover fewer encounters, but we were curious  
691 whether females would still be estimated as encountering multiple males across the sampling period.  
692 Not surprisingly, conservatively increasing the probability threshold for defining encounters reduced  
693 estimates of the number of potential mates encountered by both females ( $3.4 \pm 3.1$ ) and males ( $2.0$   
694  $\pm 2.1$ ), but the potential for females to mate with multiple males remained.

695 Because boundary effects of a closed site might artificially increase the number of  
696 encounters, we also assessed if the number of male-female encounters was sensitive to treating the  
697 site as closed, by repeating the analyses described above with a simulated buffer of 50 locations,  
698 placed randomly within 20 m around the perimeter of the site. Allowing individuals to move to these  
699 locations did not alter estimates of the average number of males encountered by females ( $5.1 \pm 3.7$ )  
700 or females encountered by males ( $2.9 \pm 3.0$ ).

### 701 ***Growth Curve for Males***

702 We estimated the growth curve of males in this population by fitting the following logistic  
703 equation (with parameters  $a$  and  $r$ ) to the observed data, using nonlinear least squares regression  
704 (Schoener and Schoener 1978):

$$L_2 = \frac{aL_1}{L_1 + (a - L_1)e^{rD}}$$



705 where  $L_1$  and  $L_2$  are the SVL of an individual measured at two successive captures, and  $D$  is  
706 the number of days between the two captures. Data from all recaptures of all males in the  
707 population were pooled to estimate this curve. We then used this logistic growth curve model to  
708 estimate the SVL of each male on the day of each of his encounters, based on his SVL at the nearest  
709 capture. Parameters for the logistic growth curve for male SVL (Equation 3) were estimated to be  $a$   
710  $= 63.7$  and  $r = -0.016$ . Snout-vent lengths predicted by the model were highly correlated with  
711 measured SVLs ( $r^2 = 0.92$ ).

### 712 *Paternity analysis*

713 Tests for sexual selection were performed on the paternity assignments in which candidate  
714 sires for offspring were the list of males their mother was estimated to have encountered (described  
715 in main text). However, we ran two further analyses. First, to assess if high paternity assignment  
716 rates in the main analysis were a consequence of restricting the number of candidate sires relative to  
717 the whole population, we also ran ten replicates of the analysis in which we sampled potential sires  
718 randomly from all 161 males, preserving the number of potential sires for each offspring individual  
719 and supplying the same group of potential sires for all offspring of a single female. Randomizing the  
720 identity but not the number of males encountered by each mother yielded 18% paternity assignment  
721 on average (13% to 24%), suggesting that the four-fold difference in assignment rates was due to  
722 identifying potential sires with greater accuracy based on their spatiotemporal movement patterns  
723 (assignment rate of 84% in the main analysis).

724 Second, we ran an analysis in which all sampled males were provided as candidate sires for  
725 all offspring. Simulation parameters specified for this analysis were 161 candidate sires and 0.96  
726 proportion of males typed, based on the proportion of observations in the field that were of marked  
727 males. Paternity assignments were concordant for 80% of the individuals that were assigned  
728 paternity by both analyses. Of the remaining 39 individuals, the LOD scores for 21 mother-sire pairs  
729 differed between analyses by less than 1; these were considered false positives from the second  
730 analysis, and the assignments of the first paternity analysis were retained for downstream analysis.  
731 For the remaining 18 offspring, with mother-sire pairs where the LOD scores between the two  
732 analyses differed by more than 1, we found that results were not altered if we conducted  
733 downstream hypothesis testing both including and excluding their paternity assignments from the  
734 first analysis.

735 Twenty-six individuals (7% of the total) were assigned paternity only when all males were  
736 provided as candidate sires, i.e. their fathers were not estimated as having encountered their  
737 mothers. For these individuals, we calculated the minimum distance between any locations at which  
738 the mother and putative sire were observed, to assess the minimum distances that these individuals  
739 would have had to move to mate with one another. The minimum distance between locations at  
740 which mothers and sires of these 26 offspring were observed (regardless of *when* these lizards were  
741 found at those locations) ranged from 0 m to 56 m, with a median of 8.7 m.

742 We found no relationship ( $F_{319} = 0.52$ ,  $P=0.47$ ; Figure S3) between the day on which an egg  
743 was laid and sire SVL, suggesting that later laid eggs are not sired by poorer quality males, at least  
744 according to the one metric of male quality that we have data for, suggesting that females may not  
745 be compelled to use the sperm of less desirable males later in the laying season. We cannot rule out  
746 that sires of later laid eggs were worse in other ways than body size compared to sires of earlier laid  
747 eggs.

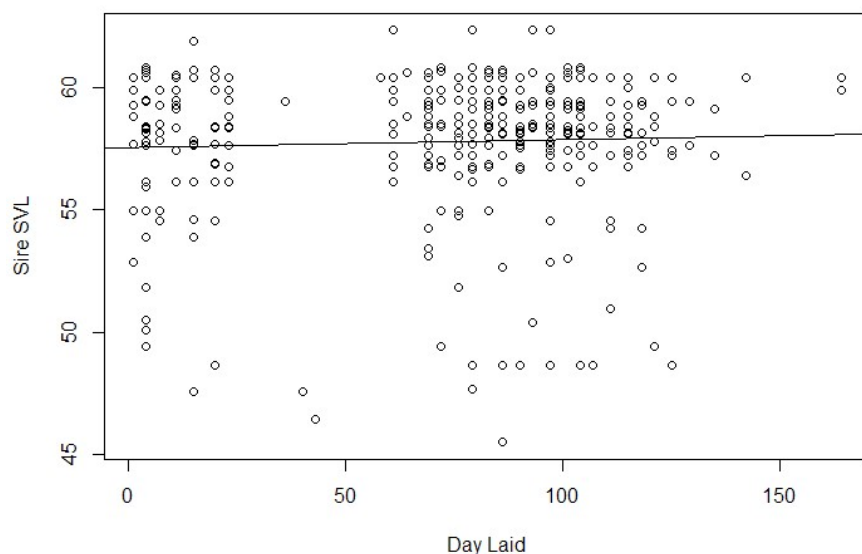

**Figure S3** Relationship between the day on which an egg was laid and the SVL of the male siring that offspring, pooled across the 36 females from whom eggs were collected.

#### 748 ***Subsampling in Time and Space***

749 To understand the effect of limiting sampling in space or time on male-female home range  
750 overlap (i.e. how mating patterns have often been assessed in previous studies of anoles), we asked if  
751 a purely spatial predictor—the overlap in minimum convex polygons (MCPs) between pairs of  
752 individuals—is affected by subsampling from our dataset to match either the median area (400 m<sup>2</sup>)  
753 or the median duration of sampling (4 weeks) or both of previous studies (see Table S2 for studies  
754 and sample areas and durations included in the calculation of the medians).

755 On average, in the whole dataset, female MCPs overlap with those of  $12.8 \pm 8.7$  males,  
756 whereas male MCPs overlap with those of  $8.1 \pm 6.7$  females. In subsamples of a randomly selected  
757 area of 400 m<sup>2</sup> (repeated 404 times), we calculated that females overlapped a mean of  $5.5 \pm 3.1$  males  
758 and males overlapped a mean of  $2.3 \pm 1.2$  females. In subsamples of a duration of four weeks (for  
759 each of a possible 55 start dates), we calculated that females overlapped a mean of  $4.5 \pm 1.0$  males  
760 and males overlapped a mean of  $3.4 \pm 0.8$  females. In subsamples with a randomly selected area of  
761 400 m<sup>2</sup> and duration of four weeks, we calculated that females overlapped a mean of  $2.4 \pm 1.9$  males  
762 and males overlapped a mean of  $1.5 \pm 1.0$  females. Thus, limited sampling in space or time decreases  
763 the number of mates inferred from spatial overlap of MCP estimates of home range. That said, at all  
764 scales of subsampling, we recovered that females overlap with multiple males, possibly suggesting  
765 that our study population may be dissimilar to many of those studied previously, and also hinting  
766 that limited sampling in space and time is not the full explanation for why previous studies of *Anolis*  
767 territoriality have largely ignored the potential for females to encounter and mate with multiple  
768 males (but see Tokarz 1998).

**Table S1**

| Locus | Reference              | Primers (5' – 3')                                  | Amplification Conditions* | Null allele frequency (for bolded loci, apparent homozygotes typed at only one allele) | Number of alleles |
|-------|------------------------|----------------------------------------------------|---------------------------|----------------------------------------------------------------------------------------|-------------------|
| S70   | Bardeleben et al. 2004 | GCAAGAGGTAGCCTCAGC<br>GTTATCAGTACGAGGCACTG         | TD1                       | -0.002                                                                                 | 18                |
| S77   | Bardeleben et al. 2004 | GAGTAAAGGTCTGGGTCAGG<br>GCAGTACAAATACCACAGAGC      | TD1                       | -0.006                                                                                 | 16                |
| AC8   | Wordley et al. 2011    | CCCAATAGAGGAAAGGGACC<br>AGAATCACGCCTTCTGCTTT       | 57.7°C                    | <b>0.053</b>                                                                           | 10                |
| AC19  | Wordley et al. 2011    | GAAAAGTAGTGGGGCATTTGG<br>AGTTTCCCAAGAAAACCCGT      | TD1                       | 0.007                                                                                  | 16                |
| AC45  | Wordley et al. 2011    | GCATCACCAGTCCCTTTG<br>GCTTTGGTTGAGTTGTATTGT<br>TTG | 57.7°C                    | <b>0.11</b>                                                                            | 6                 |
| G11   | J. Kolbe (pers. comm.) | GGTGCCACTGGGTATTCTGT<br>CTCAATCCTGCTGTCACCTG       | TD2                       | <b>0.16</b>                                                                            | 19                |

\*Amplification conditions:

1. 57.7°C: 95°C for 2', 35 cycles of 94°C for 45s, 57.7°C for 45s, 72°C for 1', 72°C for 10'.
2. TD1: 95°C for 5', 10 touchdown cycles of 95°C for 30s, 55°C – 50°C for 30s, 72°C for 45s, 25 cycles of 95°C for 30s, 50°C for 30s, 72°C for 45s, 72°C for 5'.
3. TD2: 95°C for 5', 10 touchdown cycles of 95°C for 30s, 64°C – 55°C for 30s, 72°C for 45s, 25 cycles of 95°C for 30s, 55°C for 30s, 72°C for 45s, 72°C for 5'.

**Table S2.** Sampling area and duration of previous studies on *Anolis* home ranges

Note that though the median duration is 3.5 weeks, a more conservative value of 4 weeks was used in the subsampling analysis above.

| Study                       | Sampling Area (in m <sup>2</sup> ) | Sampling Duration (in weeks) |
|-----------------------------|------------------------------------|------------------------------|
| Evans 1938                  | 150000                             | 3                            |
| Greenberg and Noble 1944    | 25                                 | 47                           |
| Gordon 1956                 | 400                                | 52                           |
| Sexton et al. 1963          | 200                                | 4                            |
| Rand 1967                   | 425                                | 5                            |
| Jenssen 1970                | 930                                | 8                            |
| Jackson 1973                | 14000                              | 1                            |
| Philibosian 1975            | 420                                | 0.2                          |
| Stamps 1977                 | 9.5                                | 5                            |
|                             | 34                                 | 13                           |
|                             | 47                                 | 13                           |
|                             | 37                                 | 15                           |
| Hicks and Trivers 1983      | 12000                              | 9                            |
| Ruby 1984                   | 441                                | 28                           |
| Fleishman 1988              | 169                                | 10                           |
| Jenssen and Nunez 1998      | 36                                 | 1                            |
| Tokarz 1998                 | 137                                | 5                            |
| Pereira et al. 2002         | 12                                 | 1                            |
|                             | 70                                 | 1                            |
| Paterson 2002               | 400                                | 1                            |
| McMann and Paterson 2003    | 400                                | 1                            |
| Calsbeek 2009               | 1500                               | 2                            |
| Johnson et al. 2010         | 500                                | 3                            |
| Nicholson and Richards 2011 | 14000                              | 52                           |
| Bush et al. 2016            | 875                                | 3                            |
| Schoener and Schoener 1982  | 100                                | –                            |
| Fitch and Henderson 1976    | –                                  | 1                            |
| Fitch and Henderson 1987    | –                                  | 2                            |
| Fobes et al. 1992.          | –                                  | 1.5                          |
| <b>Median</b>               | <b>400</b>                         | <b>3.5</b>                   |

## References:

- Bardeleben, C., Palchevskiy, V., Calsbeek, R., & Wayne, R.K. 2004. Isolation of polymorphic tetranucleotide microsatellite markers for the brown anole (*Anolis sagrei*). *Mol. Ecol. Notes*, 4, 176–178.
- Birkhead, T.R., & Hunter, F.M. (1990). Mechanisms of sperm competition. *Trends in Ecology and Evolution* 5: 48–52.
- Bush, J.M., M.M. Quinn, E.C. Balreira, M.A. Johnson. 2016. How do lizards determine dominance? Applying ranking algorithms to animal social behaviour. *Animal Behaviour* 118: 65–74.
- Calsbeek, R. 2009. Sex-specific adult dispersal and its selective consequences in the brown anole, *Anolis sagrei*. *Journal of Animal Ecology* 78: 617–624.
- Evans, L.T. 1938. Cuban field studies on the territoriality of the lizard *Anolis sagrei*. *Journal of Comparative Psychology* 25: 97–125.

- Fitch, H.S., and R.W. Henderson. 1976. A field study of the rock anoles (Reptilia, Lacertilia, Iguanidae) of Southern Mexico. *Journal of Herpetology* 10: 303–311.
- Fitch, H.S., and R.W. Henderson. 1987. Ecological and ethological parameters in *Anolis baborucoensis*, a species having rudimentary development of the dewlap. *Amphibia-Reptilia* 8: 69–80.
- Fleishman, L.J. 1988. The social behavior of *Anolis auratus*, a grass anole from Panama. *Journal of Herpetology* 22: 13–23.
- Fobes, T.M., R. Powell, J.S. Parmerlee Jr., A. Lathrop, and D.D. Smith. 1992. Natural history of *Anolis cybotes* (Sauria: Polychridae) from an altered habitat in Barahona, Dominican Republic. *Caribbean Journal of Science* 28: 200–207.
- Gordon, R.E. 1956. The biology and biodemography of *Anolis carolinensis carolinensis* Voight. Ph.D. Dissertation, Tulane University.
- Greenberg, B., and G.K. Noble. 1944. Social behavior of the American chameleon (*Anolis carolinensis* Voight). *Physiological Zoology* 17: 392 – 439.
- Hicks, R.M., and R.L. Trivers. 1983. The social behavior of *Anolis valencienni*. Pp. 570 – 595 In G.J. Rhodin, and K. Miyata. *Recent Advances in Herpetology and Evolutionary Biology*. Museum of Comparative Zoology, Cambridge, MA, USA.
- Jackson, J.F. 1973. Notes on the population biology of *Anolis tropidonotus* in a Honduran highland pine forest. *Journal of Herpetology* 7: 309–311.
- Jenssen, T.A. 1970. The ethoecology of *Anolis nebulosus* (Sauria, Iguanidae). *Journal of Herpetology*, 4: 1–38.
- Jenssen, T.A., and S.C. Nunez. 1998. Spatial and breeding relationships of the lizard, *Anolis carolinensis*: Evidence of intrasexual selection. *Behaviour* 135: 981–1003.
- Johnson, M.A., L.J. Revell, and J.B. Losos. 2010. Behavioral convergence and adaptive radiation: effects of habitat use on territorial behavior in *Anolis* lizards. *Evolution* 64: 1151–1159.
- McMann, S., and A.V. Paterson. 2003. The relationship between location and displays in a territorial lizard. *Journal of Herpetology* 37: 414–416.
- Nicholson, K.E., and P.M. Richards. 2011. Home-range size and overlap within an introduced population of the Cuban knight anole, *Anolis equestris* (Squamata: Iguanidae). *Phyllomedusa* 10: 65–73.
- Paterson, A.V. 2002. Effects of an individual's removal on space use and behavior in territorial neighborhoods of brown anoles (*Anolis sagrei*). *Herpetologica* 58: 382–393.
- Pereira, H.M., S.R. Loarie, and J. Roughgarden. 2002. Monogamy, polygyny and interspecific interactions in the lizards *Anolis pogus* and *Anolis gingivinus*. *Caribbean Journal of Science* 38: 132–136.
- Philibosian, R. 1975. Territorial behavior and population regulation in the lizards, *Anolis acutus* and *A. cristatellus*. *Copeia* 1975: 428–444.
- Rand, A.S. 1967. Ecology and social organization in the iguanid lizard *Anolis lineatopus*. *Proceedings of the United States National Museum* 122: 1–79.
- Ruby, D.E. 1984. Male breeding success and differential access to females in *Anolis carolinensis*. *Herpetologica* 40: 272–280.
- Schoener, T.W., and A. Schoener. 1982. Intraspecific variation in home-range size in some *Anolis* lizards. *Ecology* 63: 809–823.
- Sexton, O.J., H.F. Heatwole, and E.H. Meseth. 1963. Seasonal population changes in the lizard, *Anolis limifrons*, in Panama. *The American Midland Naturalist* 69: 482–491.
- Stamps, J.A. 1977a. The relationship between resource competition, risk, and aggression in a tropical territorial lizard. *Ecology* 58: 349–358.
- Tokarz, R.R. 1998. Mating pattern in the lizard *Anolis sagrei*: Implications for mate choice and sperm competition. *Herpetologica* 54: 388–394.

Wordley, C., Slate, J., & Stapley, J. 2011. Mining online genomic resources in *Anolis carolinensis* facilitates rapid and inexpensive development of cross-species microsatellite markers for the *Anolis* lizard genus. *Molecular Ecology Resources*, 11: 126–133.
